# Supplementary material
Source: Research Square preprint supplement (doi:10.21203/rs.3.rs-8906158/v1)

# Supplementary Figure 1

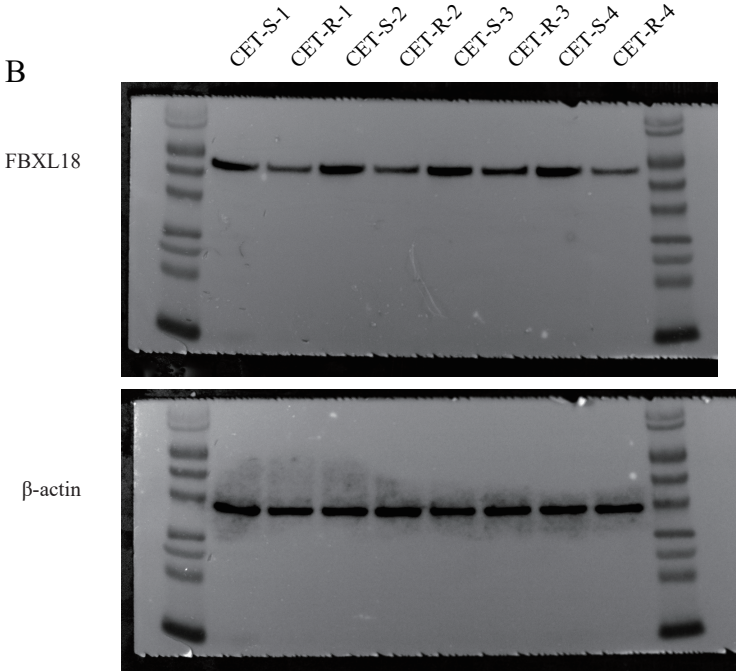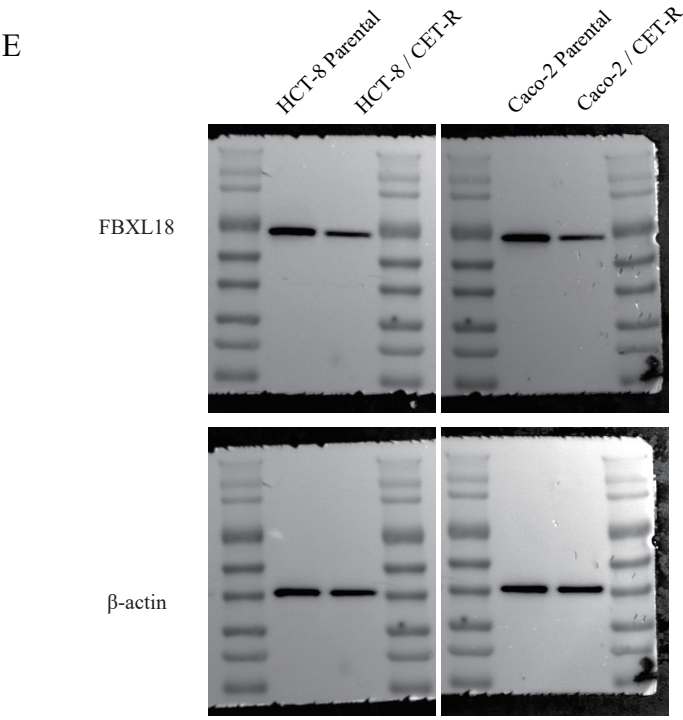

Supplement: Supplementary file 1 [file 6069e2025960066423142a55.pdf]
